# Supplementary material for: A Randomized Clinical Trial of the Effect of Continuous Glucose Monitoring on Nocturnal Hypoglycemia, Daytime Hypoglycemia, Glycemic Variability, and Hypoglycemia Confidence in Persons with Type 1 Diabetes Treated with Multiple Daily Insulin Injections (GOLD-3)
Source: PubMed Central journal article supplement — Diabetes Technol Ther. 2018 Apr 1;20(4):274–84. doi: 10.1089/dia.2017.0363 (PMC5910048; doi:10.1089/dia.2017.0363), 2018-04-01
Supplement: Supp_Fig2.pdf [file Supp_Fig2.pdf]

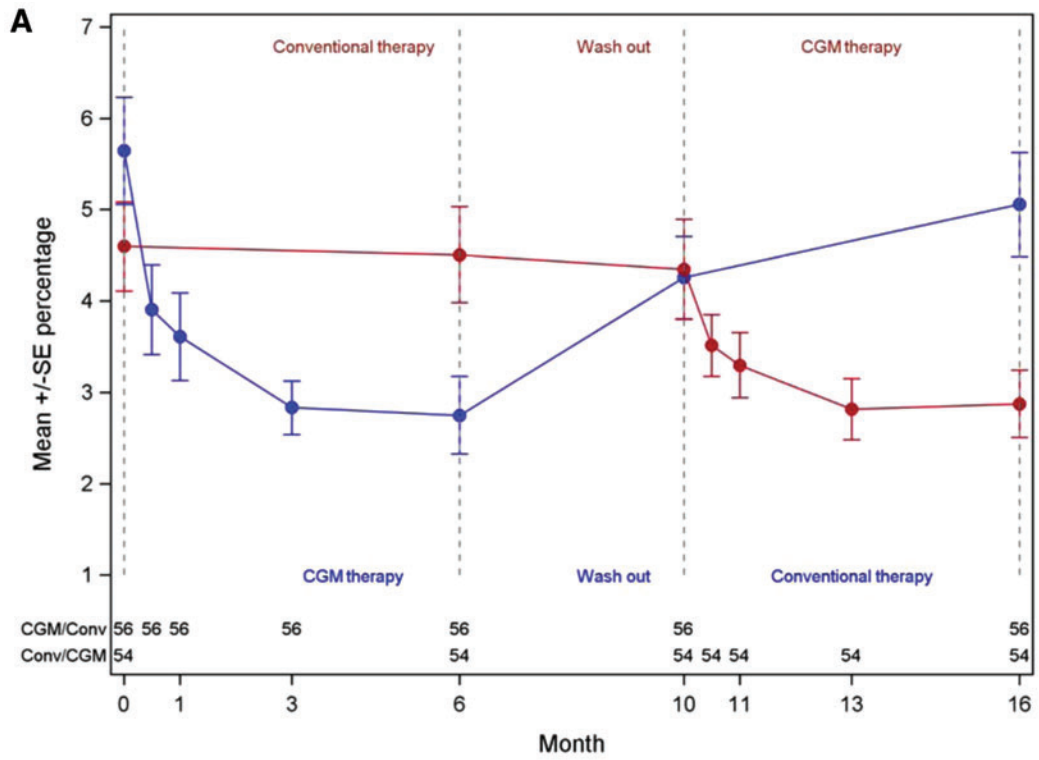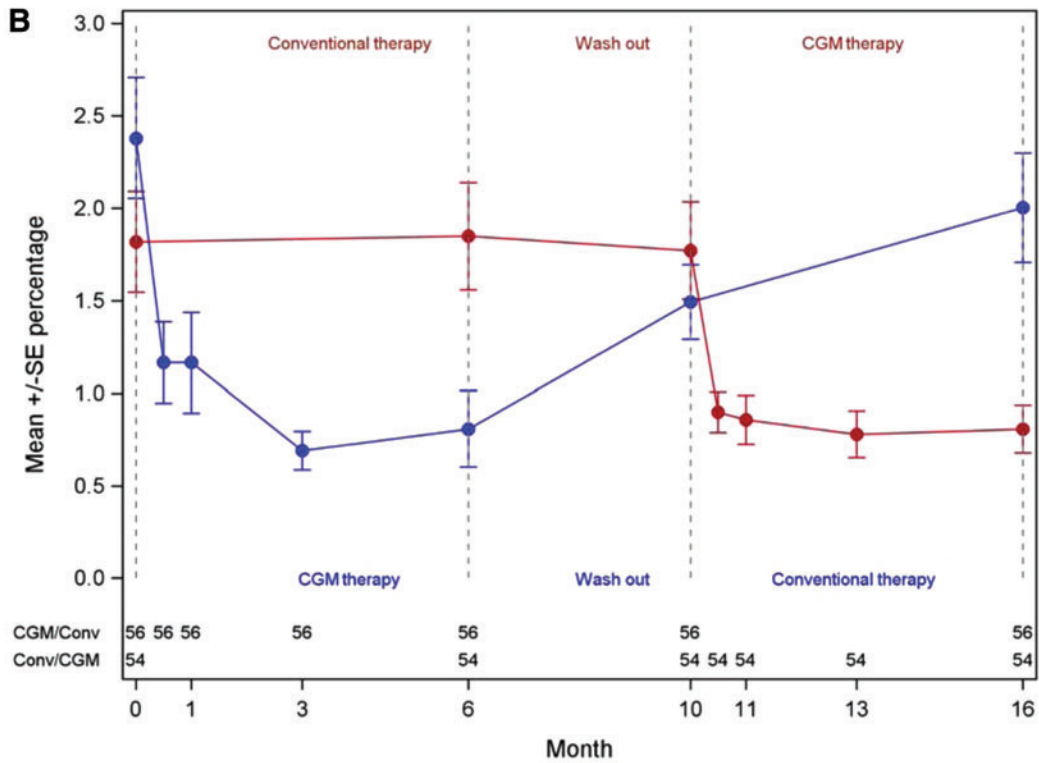

**SUPPLEMENTARY FIG. S2.** Mean +/-SE percent time of glucose levels below (A) 70 mg/dL [3.9 mmol/L] and (B) 54 mg/dL [3.0 mmol/L] per treatment sequence over time (full analysis set population—Patients with values nonmissing at all visits).
