# Supplementary material for: A Randomized Clinical Trial of the Effect of Continuous Glucose Monitoring on Nocturnal Hypoglycemia, Daytime Hypoglycemia, Glycemic Variability, and Hypoglycemia Confidence in Persons with Type 1 Diabetes Treated with Multiple Daily Insulin Injections (GOLD-3)
Source: PubMed Central journal article supplement — Diabetes Technol Ther. 2018 Apr 1;20(4):274–84. doi: 10.1089/dia.2017.0363 (PMC5910048; doi:10.1089/dia.2017.0363), 2018-04-01
Supplement: Supp_Table1.pdf [file Supp_Table1.pdf]

SUPPLEMENTARY TABLE S1. ORIGINAL ANALYSIS PERFORMED ON FULL ANALYSIS SET POPULATION AND SENSITIVITY ANALYSIS OF NUMBER OF AND PERCENT TIME WITH LOW GLUCOSE LEVELS AND NUMBER OF LOW GLUCOSE LEVELS BY USING MULTIPLE IMPUTATION (ALL PATIENTS)

|                                                                                                            |                                                                                                             | <i>RR (95% CI) for<br/>difference<br/>CGM-conventional<br/>treatment</i> | <i>P<sup>a</sup></i> |
|------------------------------------------------------------------------------------------------------------|-------------------------------------------------------------------------------------------------------------|--------------------------------------------------------------------------|----------------------|
| Percent of time with low glucose levels<br>(measured by CGM during 2 weeks)<br>below 70 mg/dL [3.9 mmol/L] | FAS population with no MI                                                                                   | 0.58 (0.49–0.70)                                                         | <0.001               |
|                                                                                                            | Demographics and baseline characteristics<br>used as variables in MI                                        | 0.61 (0.51–0.73)                                                         | <0.001               |
|                                                                                                            | Demographics, baseline characteristics,<br>and HbA1c at Run-in and Randomization<br>used as variables in MI | 0.62 (0.51–0.74)                                                         | <0.001               |
| Percent of time with low glucose levels<br>(measured by CGM during 2 weeks)<br>below 54 mg/dL [3.0 mmol/L] | FAS population with no MI                                                                                   | 0.42 (0.32–0.54)                                                         | <0.001               |
|                                                                                                            | Demographics and baseline characteristics<br>used as variables in MI                                        | 0.45 (0.35–0.59)                                                         | <0.001               |
|                                                                                                            | Demographics, baseline characteristics,<br>and HbA1c at Run-in and Randomization<br>used as variables in MI | 0.45 (0.35–0.59)                                                         | <0.001               |
| No. of low glucose levels (measured by<br>CGM during 2 weeks) below<br>70 mg/dL [3.9 mmol/L]               | FAS population with no MI                                                                                   | 0.57 (0.48–0.67)                                                         | <0.001               |
|                                                                                                            | Demographics and baseline characteristics<br>used as variables in MI                                        | 0.60 (0.50–0.71)                                                         | <0.001               |
|                                                                                                            | Demographics, baseline characteristics, and<br>HbA1c at Run-in and Randomization used<br>as variables in MI | 0.60 (0.50–0.72)                                                         | <0.001               |
| No. of low glucose levels (measured<br>by CGM during 2 weeks)<br>below 54 mg/dL [3.0 mmol/L]               | FAS population with no MI                                                                                   | 0.41 (0.32–0.53)                                                         | <0.001               |
|                                                                                                            | Demographics and baseline characteristics<br>used as variables in MI                                        | 0.45 (0.35–0.58)                                                         | <0.001               |
|                                                                                                            | Demographics, baseline characteristics, and<br>HbA1c at Run-in and Randomization<br>used as variables in MI | 0.45 (0.34–0.58)                                                         | <0.001               |

<sup>a</sup>RR (95% CI) and *P*-value are obtained by using SAS procedure PROC MI (*n*=50 sampled studies), PROC GENMOD (with sequence, patient (sequence), period, and treatment as class variables) and PROC MIANALYZE.

CGM, continuous glucose monitoring; CI, confidence intervals; FAS, full analysis set; HbA1c, hemoglobin A1c; MI, multiple imputation; RR, relative risks.
